# Supplementary material
Source: Springer Nature journal article supplement (https://www.springermedizin.de/resource/supplementary/12888_2013_1364_MOESM2_ESM.pdf/9479998)
Supplement: MOESM2 [file 9479998]

Citations from Medline, PsycINFO and CINAHL searches (n=3826)

Medline search: (n=2376)

PsycINFO search: (n=920)

CINAHL search (n=530)

Duplicate publications (n= 646)

Initial screening of titles and abstracts (n= 3180)

Excluded on basis of review of title and/or abstract (n= 3113)

Studies assessed for eligibility (n= 60)

Citations identified from reference lists  
and citations (n=2)

Inclusion criteria not met (n= 37)  
Published in languages other than English (n=7)

Studies included in this review (n= 25)

Cohort studies (n=5)

Case-control studies (n=1)

Cross-sectional studies (n=19)
